# Supplementary material for: Measuring the Impacts of Water Safety Plans in the Asia-Pacific Region
Source: Int J Environ Res Public Health. 2018 Jun 10;15(6):1223. doi: 10.3390/ijerph15061223 (PMC6025033; doi:10.3390/ijerph15061223)
Supplement: Supplementary file 1 [file ijerph-15-01223-s001.pdf]

**Table S1.** Number of sites participating in the impact assessment in each country and criteria used for their selection. Institutions responsible for selecting study sites varied between countries and included national-level government agencies (e.g. departments/ministries of health and water), national water suppliers, heads of local government units, and often WHO country or regional staff.

| Country      | Number of sites | Criteria for selecting WSP sites                                                                                                                     |
|--------------|-----------------|------------------------------------------------------------------------------------------------------------------------------------------------------|
| Bangladesh   | 10              | Targeted a distribution across new urban WSPs, new rural WSPs, and established WSPs                                                                  |
| Bhutan       | 13              | Based on geographical representation                                                                                                                 |
| Cambodia     | 8               | Selected all WSP sites                                                                                                                               |
| Cook Islands | 1               | Based on data availability                                                                                                                           |
| Lao PDR      | 5               | Well-implemented WSPs (provincial suppliers), logistics (small town water suppliers near these provincial suppliers), and oldest WSPs (rural)        |
| Mongolia     | 8               | Oldest WSPs (urban), pilot areas with well-trained and experienced WSP teams, or areas with need (water scarcity and water quality problems) (rural) |
| Nepal        | 15              | Based on sites that fit the criteria received from WHO headquarters (a mix of urban and rural sites, established WSP sites and new WSP sites)        |
| Philippines  | 15              | Based on good data availability and older WSPs                                                                                                       |
| Samoa        | 1               | Site with a recently completed WSP                                                                                                                   |
| Sri Lanka    | 10              | More mature WSPs                                                                                                                                     |
| Timor-Leste  | 10              | All pilot WSP sites were selected                                                                                                                    |
| Vanuatu      | 3               | No information                                                                                                                                       |

**Table S2.** Description of data collection teams in each country, training processes, dates of baseline and follow-up data collection, and proportion of sites where baseline data were collected retrospectively.

| Country    | Data collection team organizations                       | Description of training process                                          | Data collection dates |              |                 |
|------------|----------------------------------------------------------|--------------------------------------------------------------------------|-----------------------|--------------|-----------------|
|            |                                                          |                                                                          | Baseline              | Retro/ Total | Follow-up       |
| Bangladesh | DPHE, ITN-BUET, PMID                                     | Formal half-day training led by the NPO-WSHE and national WHO consultant | Nov 2014 - Mar 2015   | 9/10         | Jan - Mar 2016  |
| Bhutan     | MOH, MoWHS, PHED, WHO, WSP Team, Dzongkhag Engineers, HA | No formal training/used forms as guidance                                | Sep 2014 - Apr 2015   | 3/13         | Jan - June 2016 |
| Cambodia   | IITC, RUPP, WHO                                          | No formal training/used forms as guidance                                | May 2015              | 8/8          | Jan - Mar 2016  |

|              |                                                                  |                                                                                    |                     |       |                     |
|--------------|------------------------------------------------------------------|------------------------------------------------------------------------------------|---------------------|-------|---------------------|
| Cook Islands | WHO consultant                                                   | No formal training/ used forms as guidance                                         | Feb 2015            | 1/1   | Feb 2016            |
| Lao PDR      | CAWST, DHHP, DHOs, DHUP, DWS, MPWT, LPB, Provincial Offices, WHO | Field training for urban WSPs by WHO; no formal training for rural sites           | Jan - Feb 2015      | 4/5   | Feb - Apr 2016      |
| Mongolia     | General Authority of Specialized Inspection, MNUMS, WSSA – USUG  | Formal, structured multi-day training                                              | Jan - Feb 2015      | 5/8   | Feb - May 2016      |
| Nepal        | DWSS, WHO, WSSD Udayapur                                         | Data collection by master WSP trainer. No formal training; used forms as guidance. | Sep 2014 - Feb 2015 | 10/15 | Feb - Mar 2016      |
| Philippines  | LCI Env Corp, DOH, LWUA                                          | Organized by WPRO and supported by WHO SEARO via Skype/used forms as guidance      | Feb 2015            | 4/15  | Feb - Apr 2016      |
| Samoa        | WHO                                                              | No formal training/used forms as guidance.                                         | Jan 2015            | 0/1   | Mar 2016            |
| Sri Lanka    | NWSDB                                                            | One-day training by WHO consultant                                                 | Nov 2015 - Feb 2016 | 9/10  | Dec 2015 - Apr 2016 |
| Timor-Leste  | WHO                                                              | Consultant trained remotely by WHO                                                 | Nov 2014 - Dec 2014 | 10/10 | Feb 2016            |
| Vanuatu      | WHO, Provincial EHO                                              | No information                                                                     | Feb 2016            | 1/3   | Feb 2016            |

Abbreviations: ITN-BUET: Bangladesh University of Engineering and Technology; PMID: Participatory Management Initiative for Development; DPHE: Department of Public Health Engineering; MoWHS: Ministry of Works and Human Settlement; PHED: Public Health Engineering Division; MOH: Ministry of Health; RUPP: Royal University of Phnom Penh; DHHP: Department of Hygiene and Health Promotion; DWS: Water Supply Division; MPWT: Ministry of Public Works and Transport; DHUP: Department of Housing and Urban Planning; CAWST: Centre for Affordable Water and Sanitation Technology; WSSA – USUG: Water Supply and Sewerage Authority; MNUMS: Mongolian National University of Medical Sciences; DWSS: - Department of Water Supply and Sanitation; DOH: Department of Health, LWUA: Local Water Utilities Administration; NWSDB: National Water Supply and Drainage Board; IITC: Institute of Technology Cambodia; DHOs: District Health Offices.

**Table S3.** Comparison of data collectors' scores with independently assigned scores by Aquaya staff. Differences are the independent researcher score subtracted from the country data collector score; positive values indicate that the data collector score was higher than the researcher score. p-values are the result of a paired t.test comparing the groups of scores. a – Median difference in scores.

| Indicator                                                | Baseline |                   |      | Follow-up |                   |       |
|----------------------------------------------------------|----------|-------------------|------|-----------|-------------------|-------|
|                                                          | n        | Diff <sup>a</sup> | p    | n         | Diff <sup>a</sup> | p     |
| <b>O1b Levels of operations and management practices</b> |          |                   |      |           |                   |       |
| 1) Operational monitoring plan                           | 25       | -0.2              | 0.33 | 18        | -0.2              | 0.33  |
| 2) Compliance monitoring plan                            | 25       | 0                 | 1    | 16        | 0.1               | 0.75  |
| 3) Consumer satisfaction monitoring                      | 25       | 0                 | 0.85 | 16        | -0.1              | 0.77  |
| 4) Standard operating procedures                         | 25       | -0.2              | 0.19 | 16        | -0.9              | <0.01 |
| 5) Emergency response plan                               | 24       | 0.2               | 0.5  | 16        | 0.1               | 0.72  |
| 6) Operator or caretaker training                        | 25       | 0.4               | 0.02 | 16        | -0.1              | 0.33  |

|            |                                                          |    |      |       |    |      |      |
|------------|----------------------------------------------------------|----|------|-------|----|------|------|
|            | 7) Consumer education programs                           | 24 | -0.2 | 0.38  | 17 | -0.1 | 0.5  |
|            | 8) Equipment maintenance/calibration                     | 25 | -0.1 | 0.65  | 16 | -0.2 | 0.16 |
| <b>E1a</b> | <b>Equity</b>                                            |    |      |       |    |      |      |
|            | 1) Participation                                         | 22 | 1.3  | <0.01 | 11 | 0.5  | 0.11 |
|            | 6) Emergency response and communication<br>reflect needs | 20 | 0.4  | 0.11  | 12 | 0    | 1    |

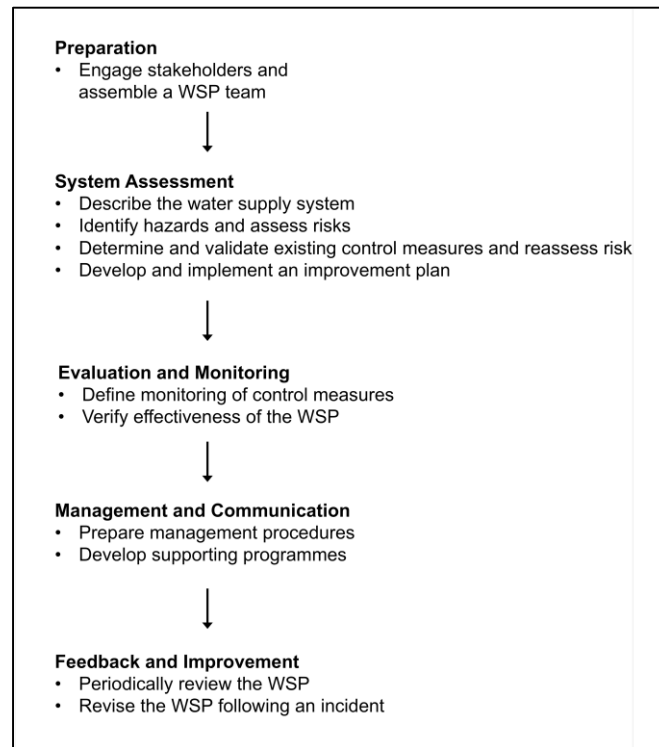

**Figure S1:** Steps of the WSP process.

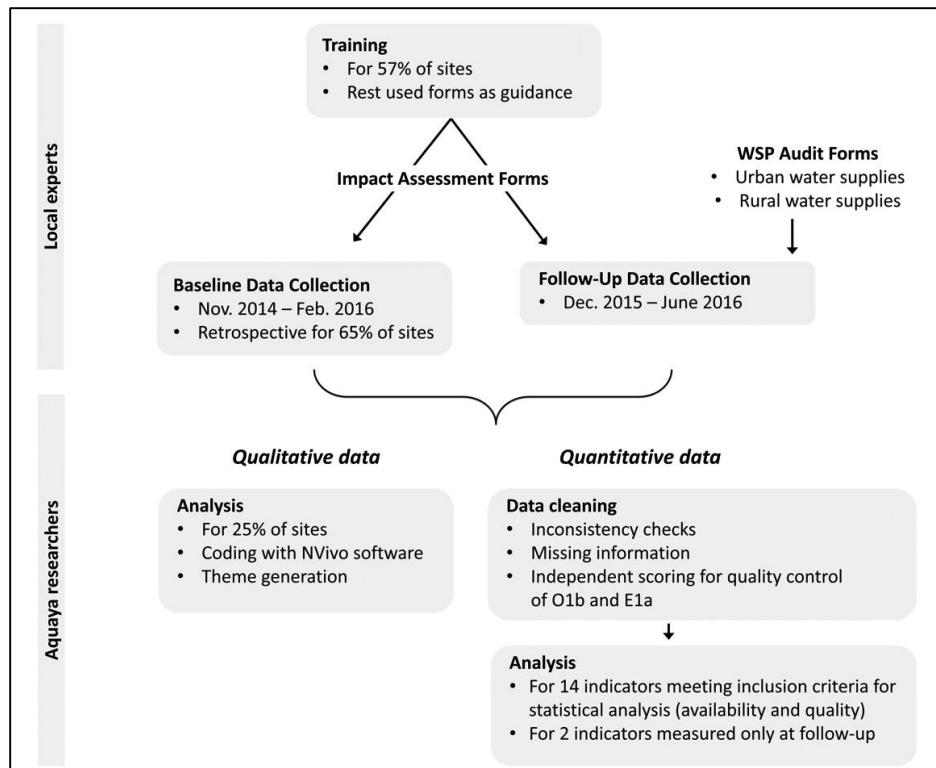

**Figure S2.** Flowchart of data collection and analysis process.
